# Supplementary material for: YOD1/TRAF6 association balances p62-dependent IL-1 signaling to NF-κB
Source: eLife journal article supplement (doi:10.7554/elife.22416), 2017-02-28
Supplement: supp [file elife-22416-supp-v1.zip]

**A**

90 - LVGY**P**PECLDLSNG - 103 H. sapiens  
85 - LVGY**P**PECLDLSDR - 98 M. musculus  
90 - LVGY**P**PECLDLSNG - 103 B. taurus  
90 - LVGY**P**PECLDLSEG - 103 S. scrofa

PXEXXAr/Ac TIM consensus

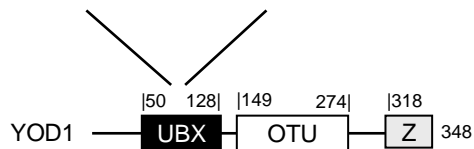

**B**

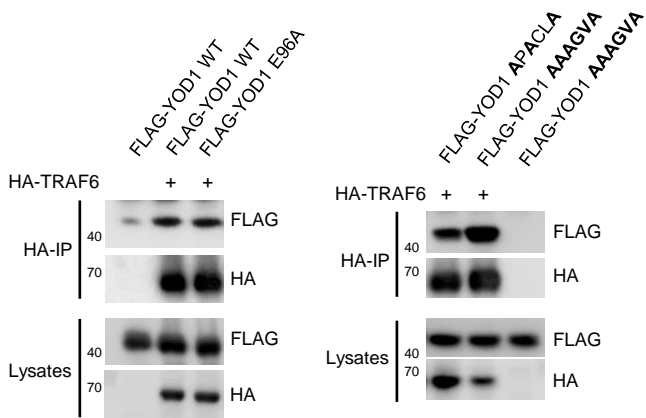

**C**

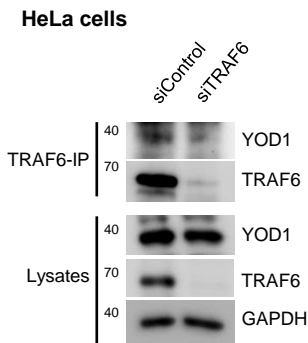

**D**

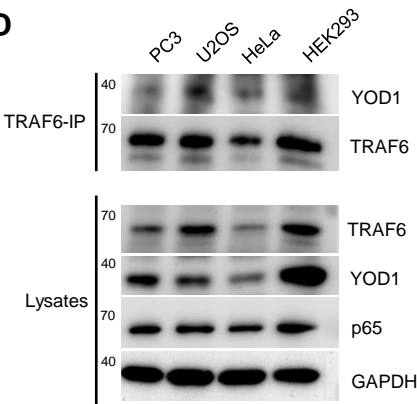

**E**

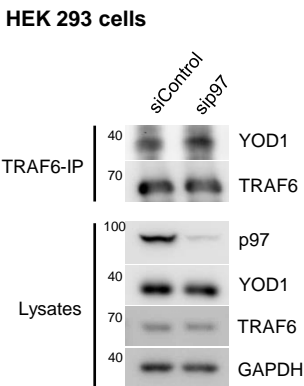

**Figure 1 – Figure Supplement 3**
