# Supplementary figures and images for: YOD1/TRAF6 association balances p62-dependent IL-1 signaling to NF-κB
Source: eLife journal article supplement (doi:10.7554/elife.22416), 2017-02-28

**A**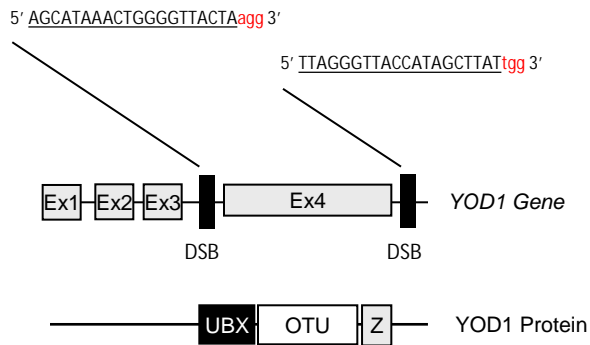**B**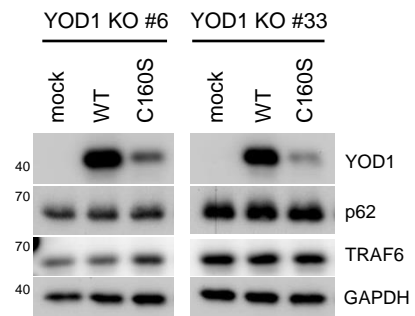**C**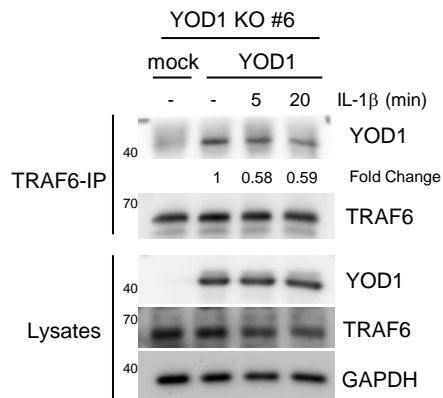**D**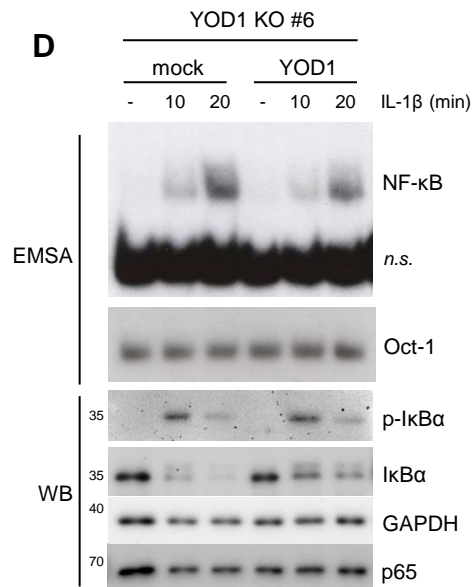**Figure 5 – Figure Supplement 1**

Supplement: supp [file elife-22416-supp-v1.zip]

**A**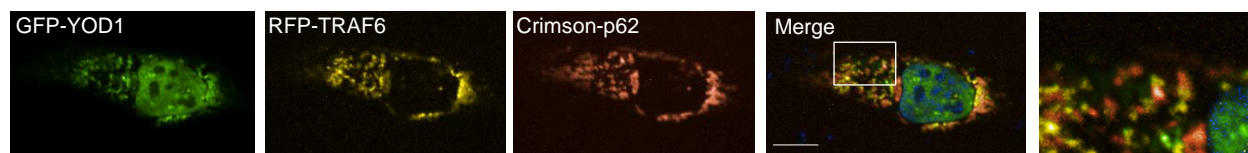**B**

RFP-TRAF6, GFP-YOD1 WT, Crimson-p62

RFP-TRAF6, GFP-YOD1 C160S, Crimson-p62

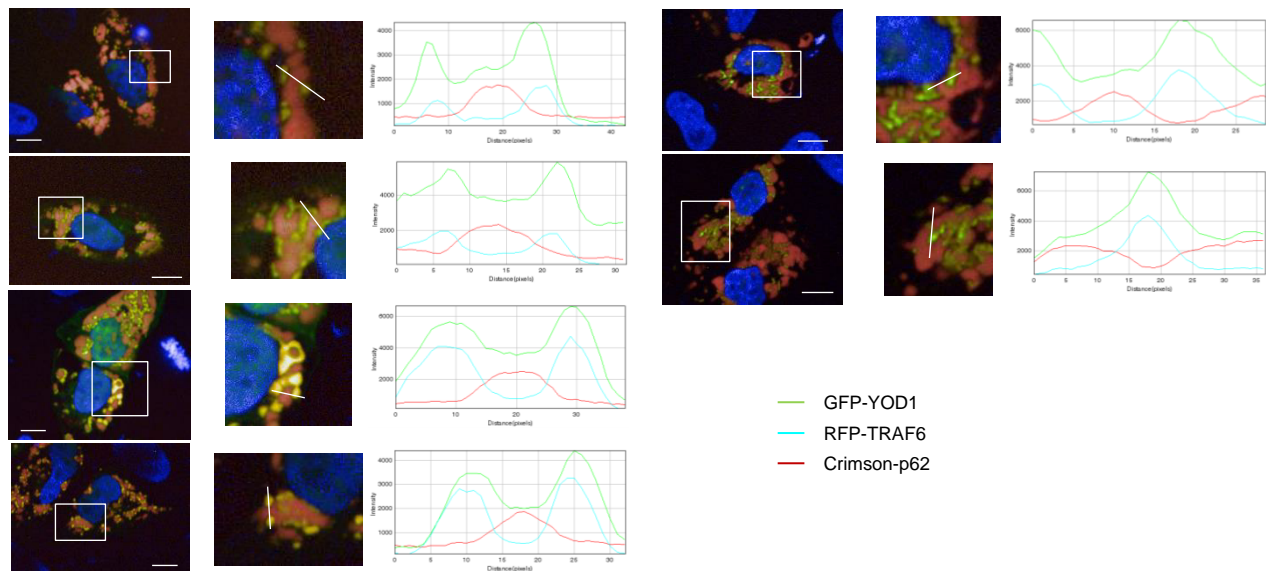**C**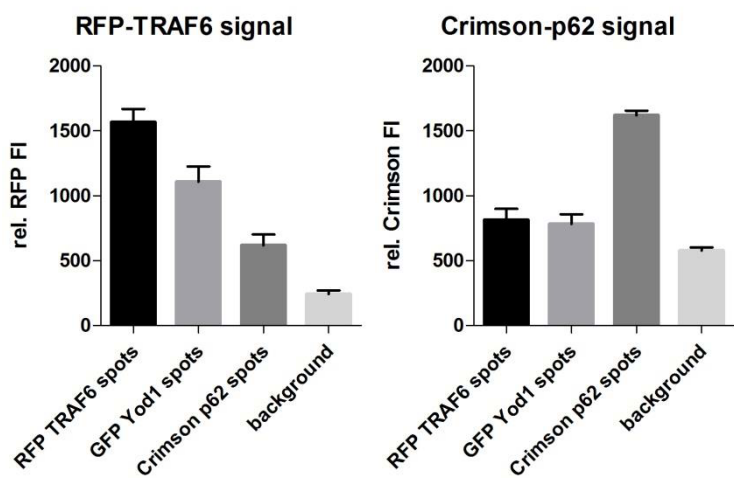**Figure 3 – Figure Supplement 2**

Supplement: supp [file elife-22416-supp-v1.zip]

**A**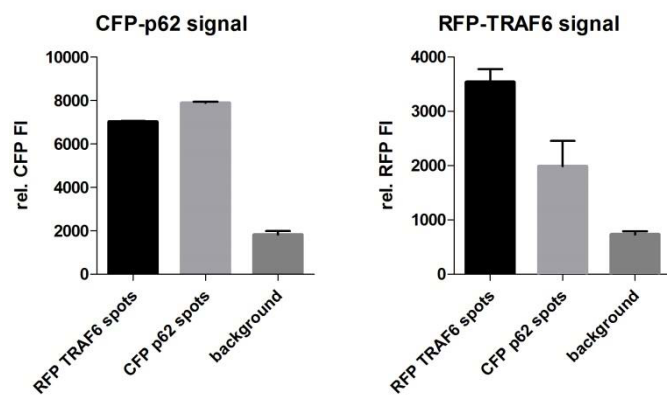**B**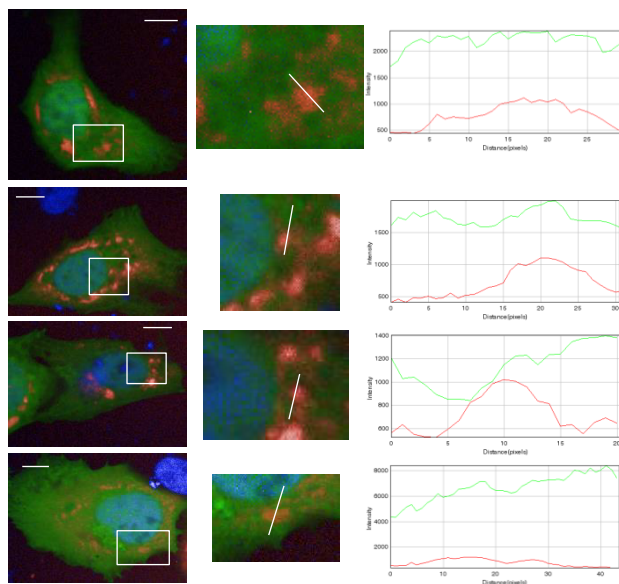**C**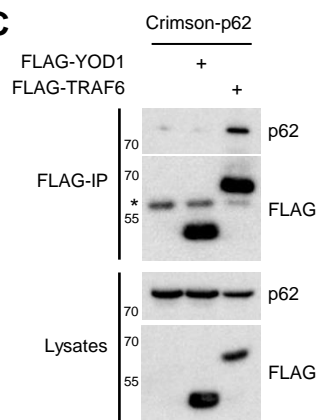**Figure 3 – Figure Supplement 1**

Supplement: supp [file elife-22416-supp-v1.zip]

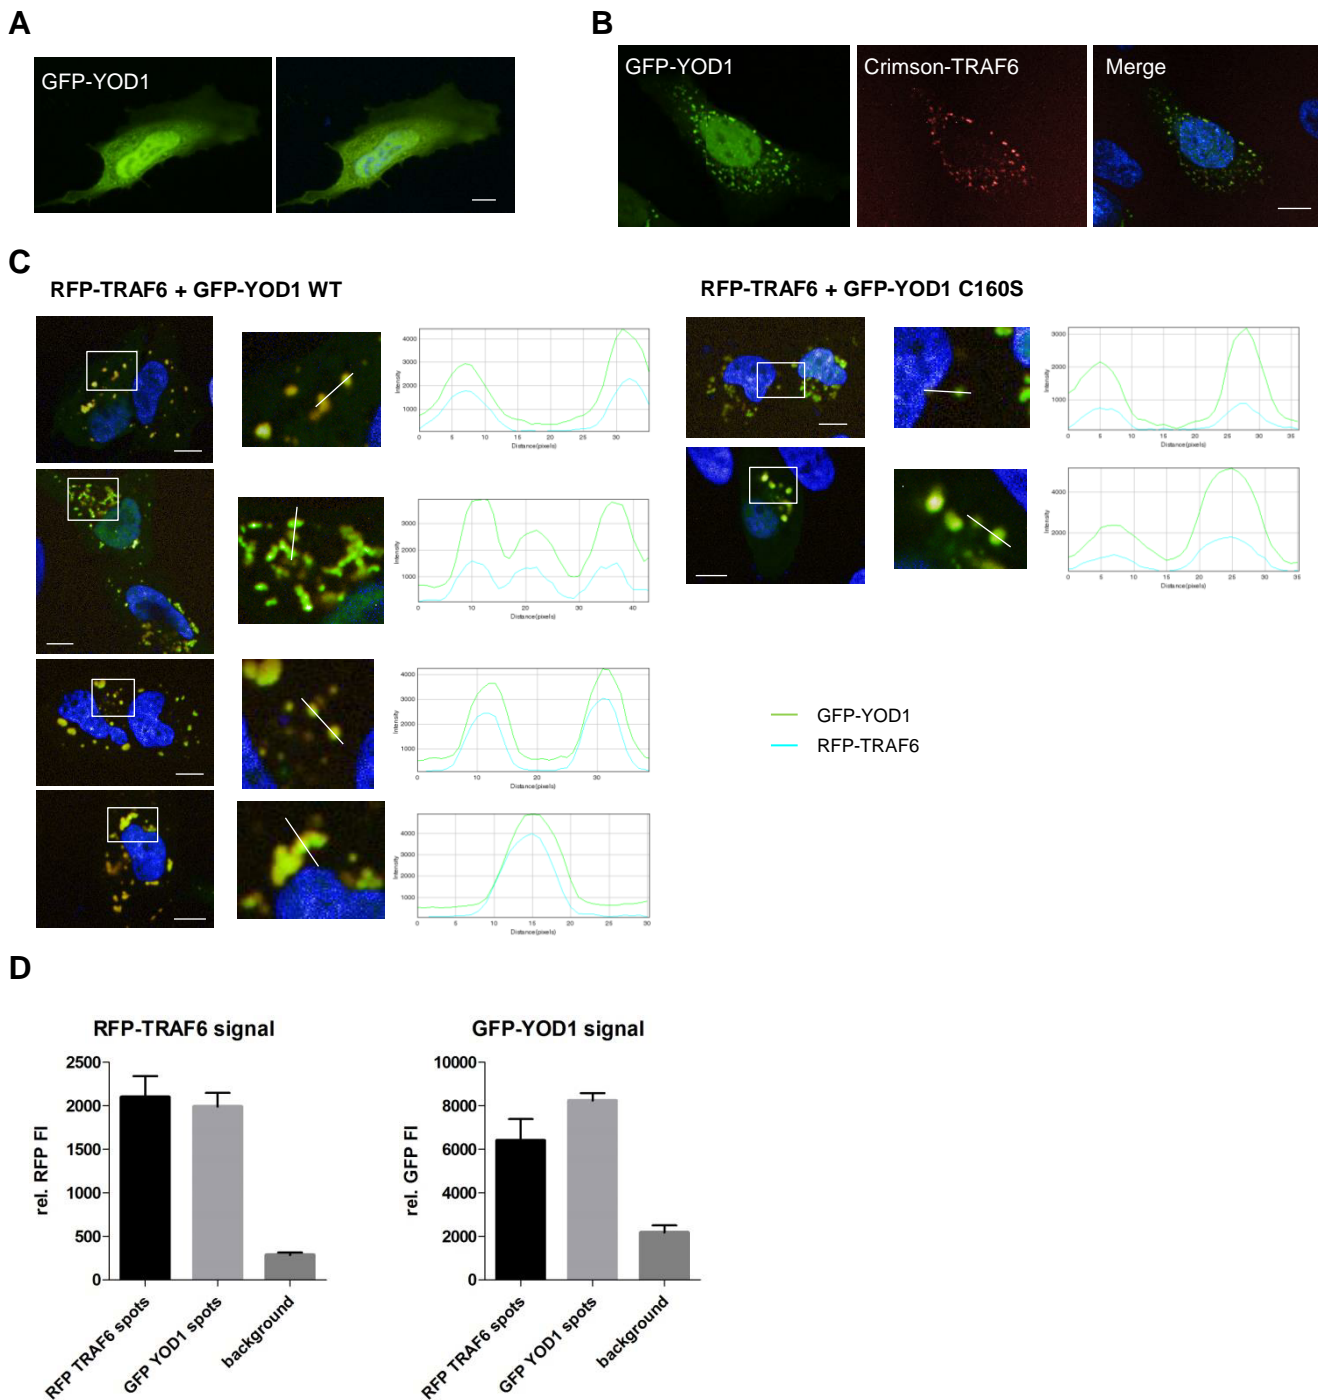

Figure 2 – Figure Supplement 1

Supplement: supp [file elife-22416-supp-v1.zip]

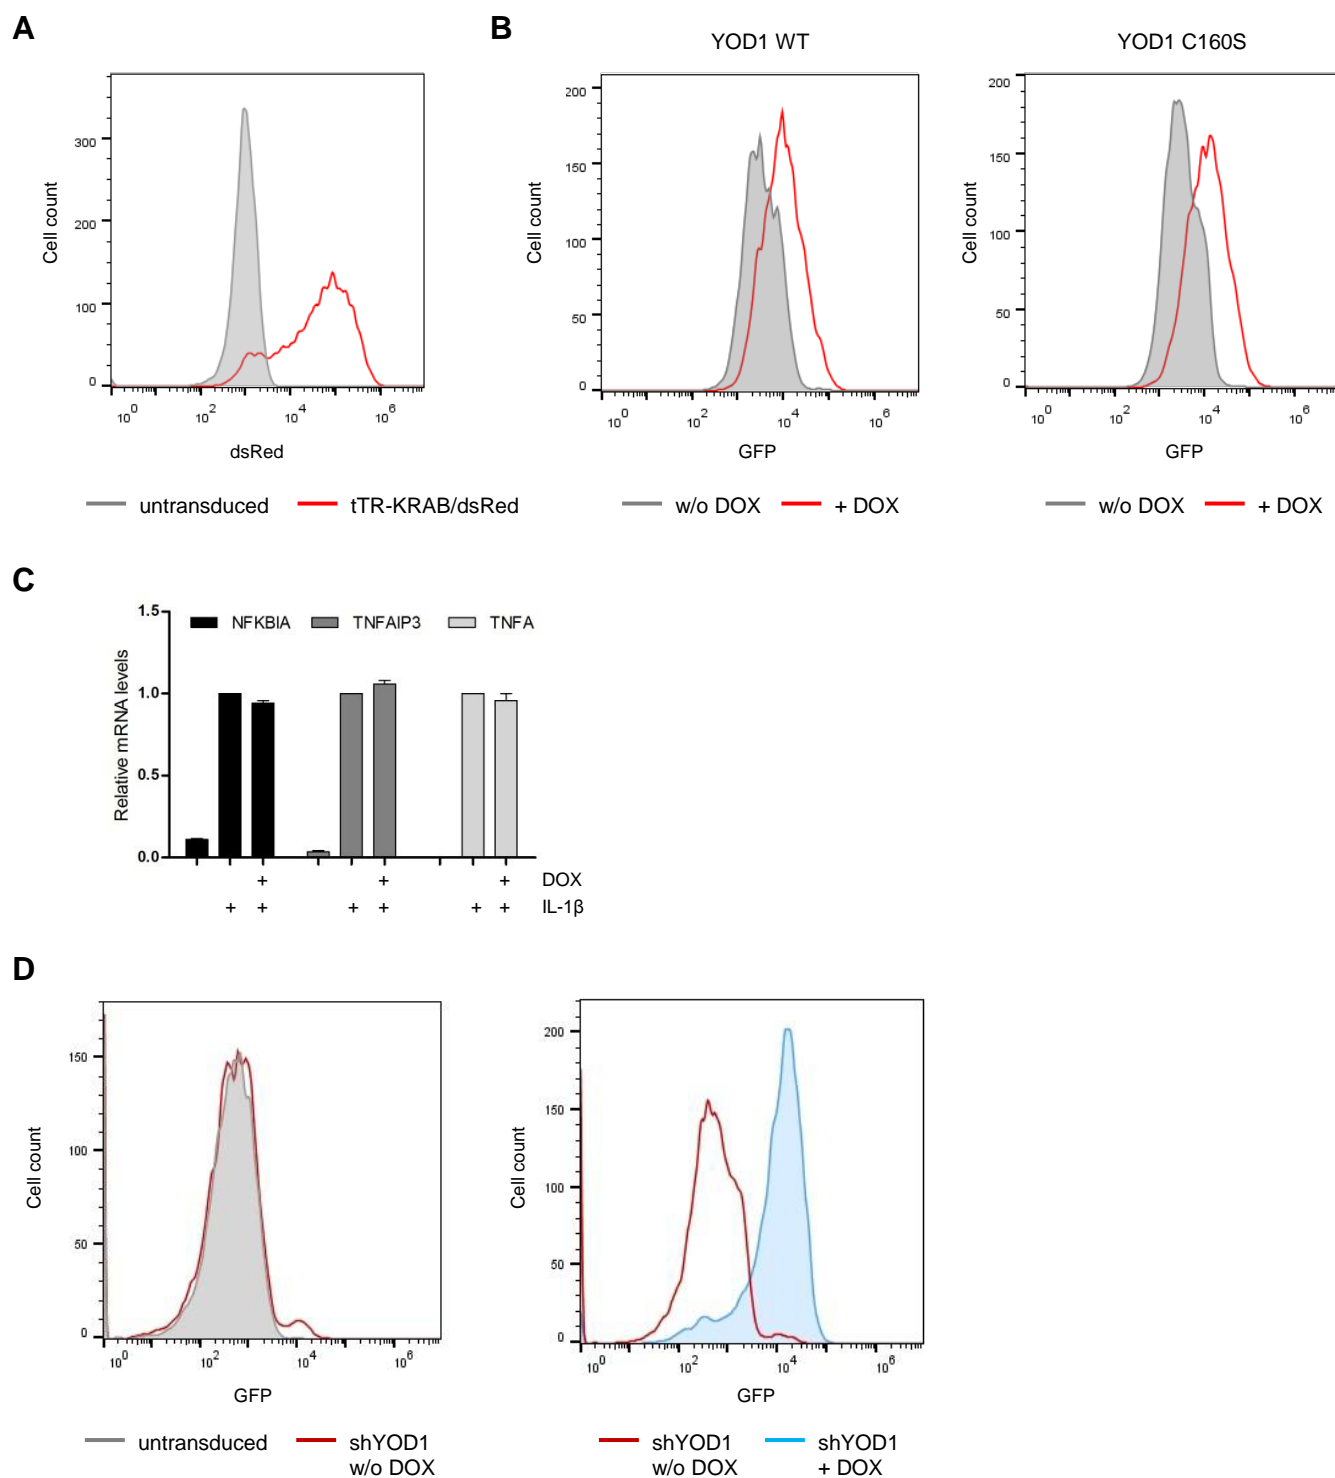

**Figure 4 – Figure Supplement 1**

Supplement: supp [file elife-22416-supp-v1.zip]

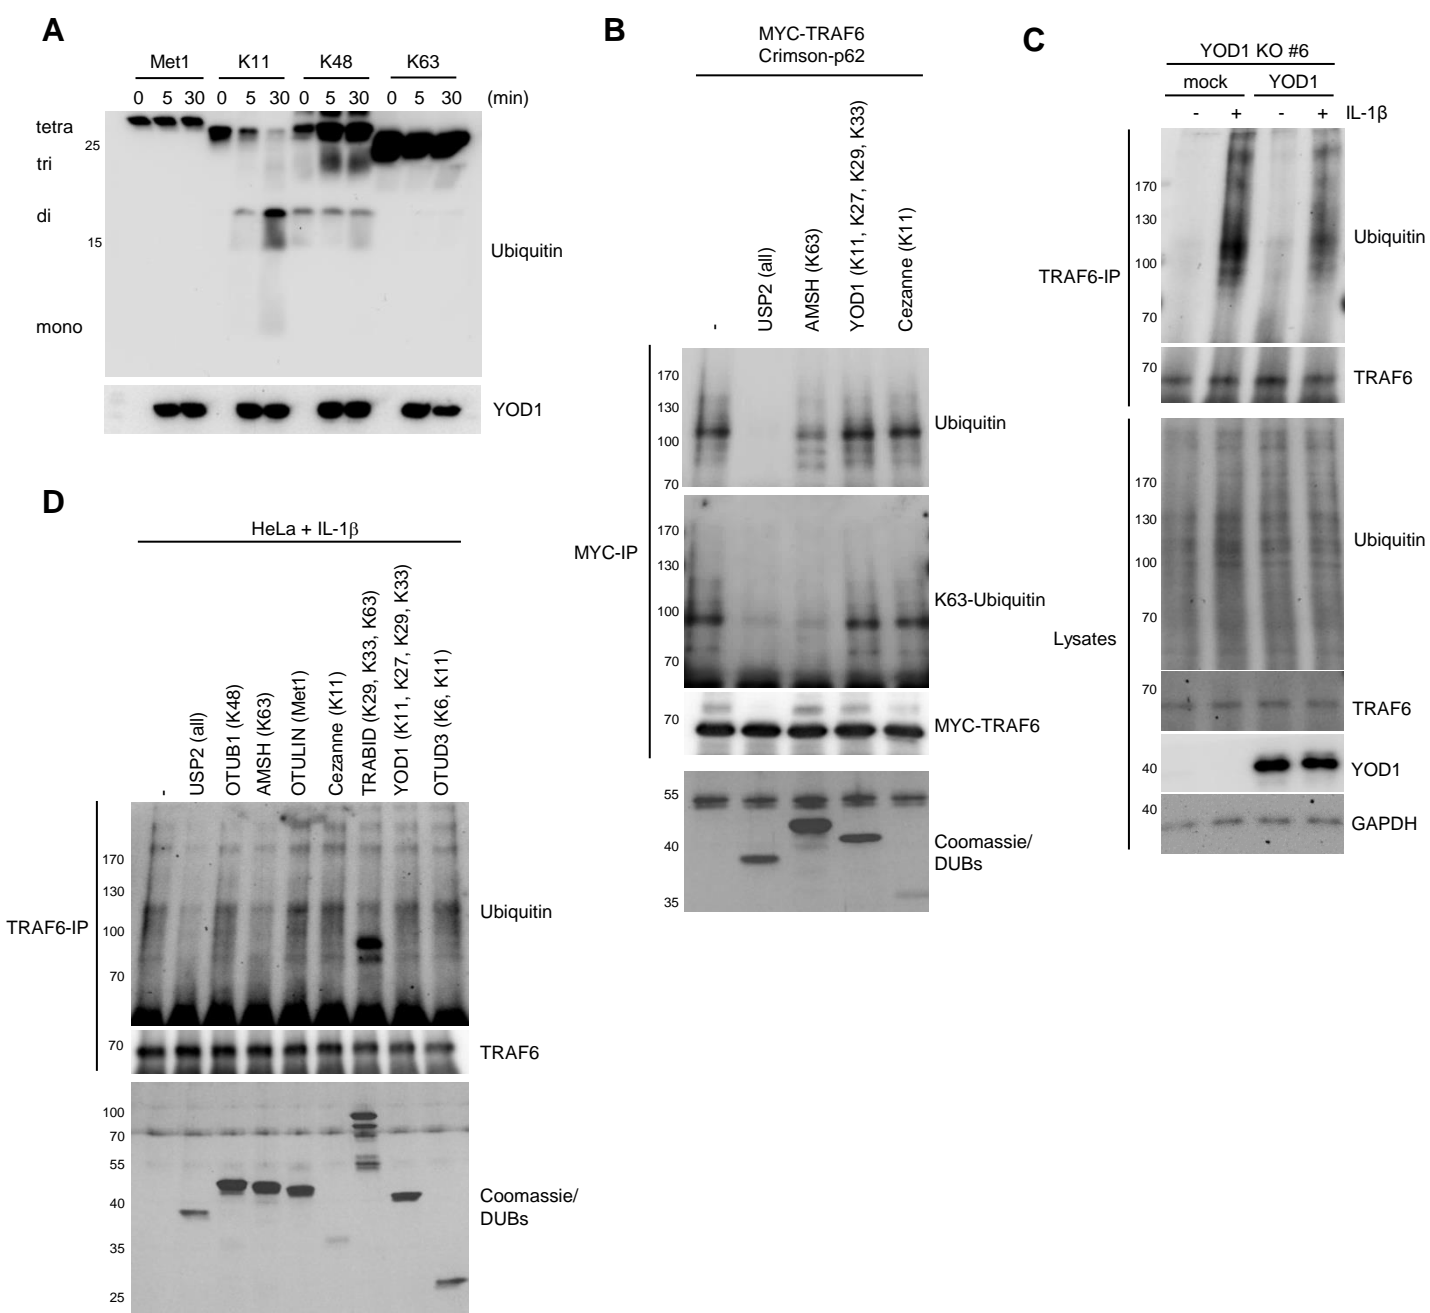

**Figure 7 – Figure Supplement 1**

Supplement: supp [file elife-22416-supp-v1.zip]

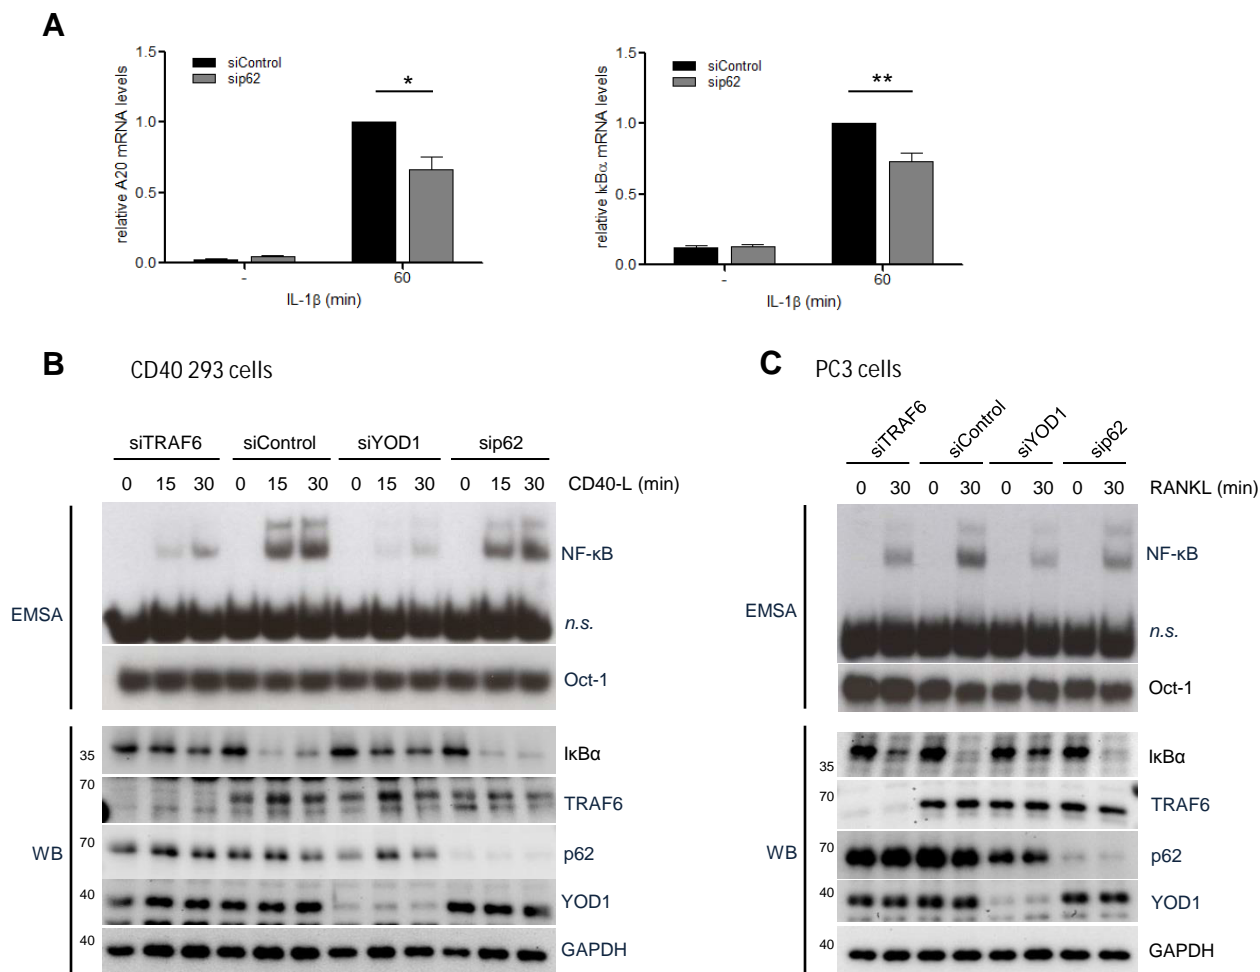

Figure 6 – Figure Supplement 1

Supplement: supp [file elife-22416-supp-v1.zip]

**A**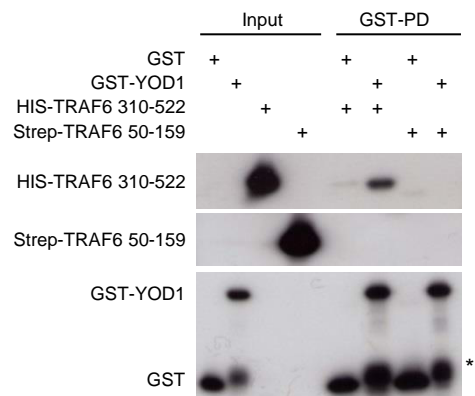**B**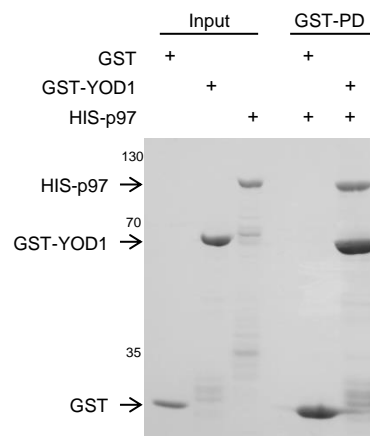**C**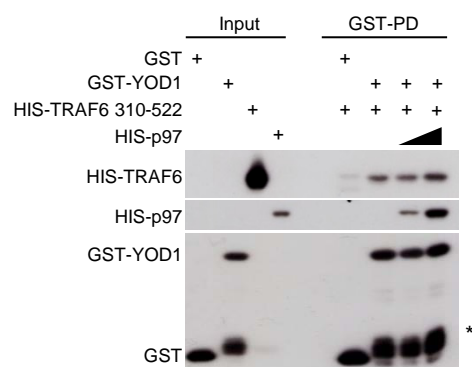**Figure 1 – Figure Supplement 2**

Supplement: supp [file elife-22416-supp-v1.zip]
